# Supplementary material for: 1H, 13C and 15N resonance assignments for the acetyltransferase domain of the kinetoplastid kinetochore protein KKT23 from Trypanosoma brucei
Source: Springer Nature journal article supplement (doi:10.1007/s12104-025-10235-4), 2025-05-02
Supplement: MOESM1 [file 12104_2025_10235_MOESM1_ESM.pdf]

## SUPPORTING INFORMATION FOR:

**<sup>1</sup>H, <sup>13</sup>C and <sup>15</sup>N resonance assignments for the acetyltransferase domain of the kinetoplastid kinetochore protein KKT23 from *Trypanosoma brucei***

*Patryk Ludzia<sup>1,2</sup>, Charlotte Nugent<sup>1</sup>, Bungo Akiyoshi<sup>1,3\*</sup> and Christina Redfield<sup>1\*</sup>*

<sup>1</sup>Department of Biochemistry, University of Oxford, Oxford, OX1 3QU, UK

<sup>2</sup>Department of Biochemistry, University of Cambridge, Cambridge, CB2 1GA, UK

<sup>3</sup>Institute of Cell Biology, School of Biological Sciences, University of Edinburgh, Edinburgh, EH9 3BF, UK

\*Corresponding authors:

B. Akiyoshi [bungo.akiyoshi@ed.ac.uk](mailto:bungo.akiyoshi@ed.ac.uk) Tel: +44 (0) 1316 50 7005

C. Redfield [christina.redfield@bioch.ox.ac.uk](mailto:christina.redfield@bioch.ox.ac.uk) Tel: +44 (0)1865 275330

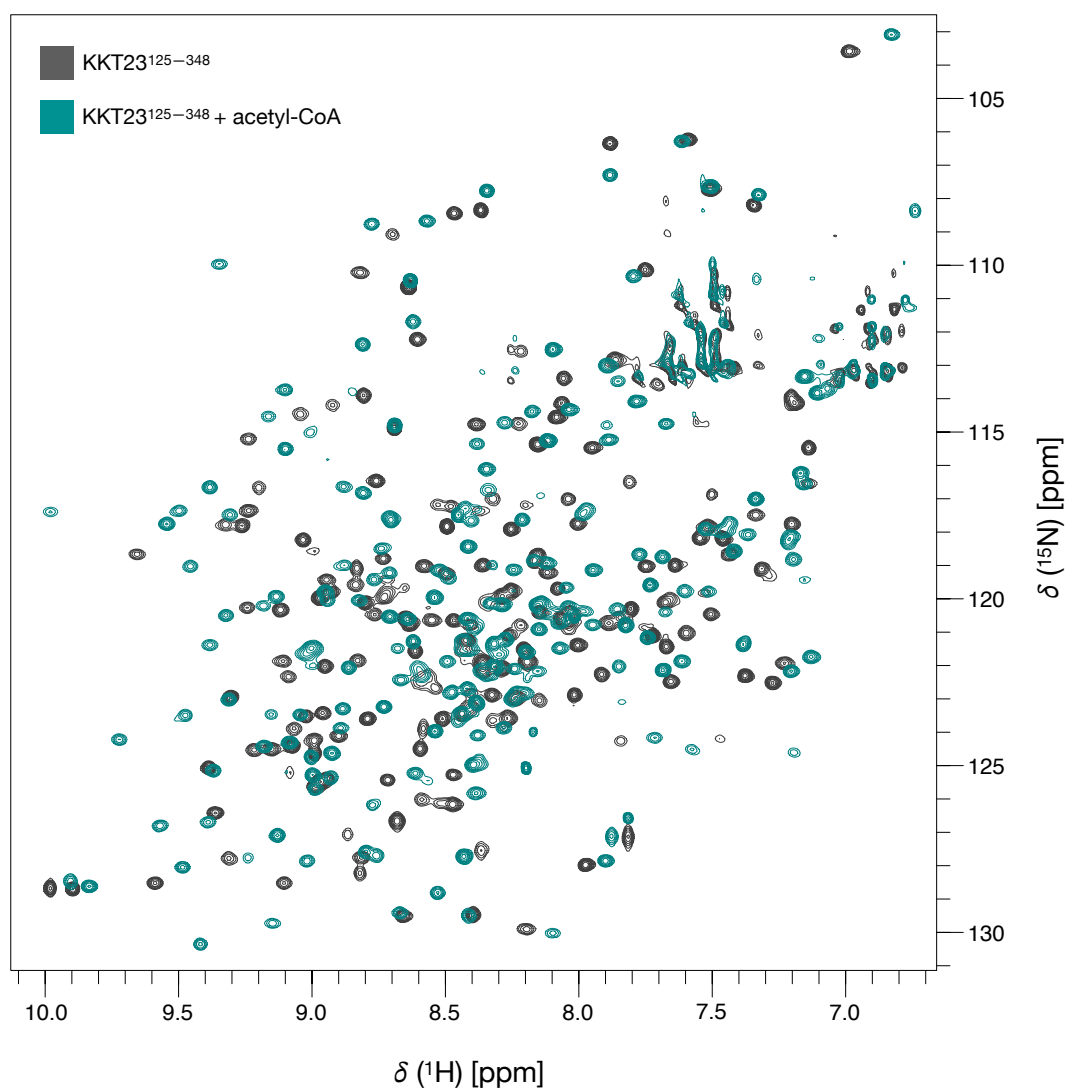

### Supporting Figure 1

Overlay of 750 MHz  $^1\text{H}$ - $^{15}\text{N}$  BEST-TROSY spectra of apo-KKT23<sup>125–238</sup> (grey) and KKT23<sup>125–238</sup> bound to acetyl-CoA (teal). Some peaks in the region of 111–114 ppm and upfield of ~7.7 ppm are artefacts in the BEST-TROSY arising from incomplete cancellation of signals from the side chain amides of Asn and Gln.

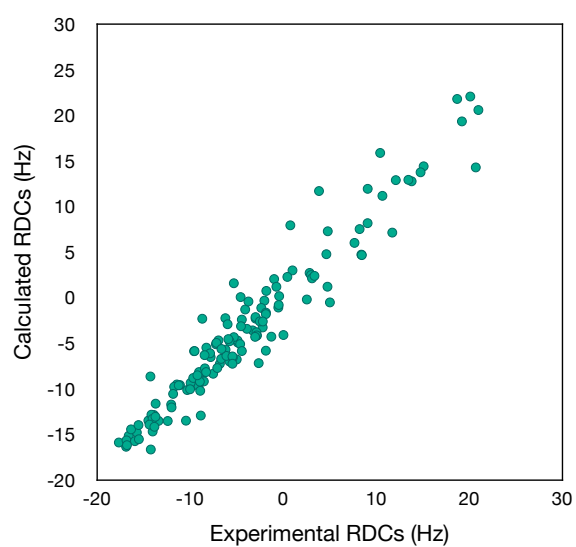

### Supporting Figure 2

Plot of the experimental RDCs versus the calculated RDCs. The good agreement between experimental and calculated RDCs is shown by the Q value of 0.24.
